# Supplementary material for: Risk Factors for Invasive Aspergillosis in Patients Admitted to the Intensive Care Unit With Coronavirus Disease 2019: A Multicenter Retrospective Study
Source: Front Med (Lausanne). 2021 Nov 16;8:753659. doi: 10.3389/fmed.2021.753659 (PMC8635191; doi:10.3389/fmed.2021.753659)
Supplement: Supplementary file 1 [file Data_Sheet_1.docx]

**Supplementary information**

**Risk Factors for Invasive Aspergillosis in Patients Admitted to the ICU with COVID-19: A Multicenter Retrospective Study**

Jiqian Xu1,2,6, Xiaobo Yang1, Zheng Lv1, Ting Zhou1, Hong Liu1,2, Xiaojing Zou1, Fengsheng Cao4, Lu Zhang4, Boyi Liu5, Wei Chen5, Yuan Yu1, Huaqing Shu1, Shiying Yuan1, Ming Hu3†, Chaolin Huang2†, You Shang1,2,6†

**Figure S1.**

**
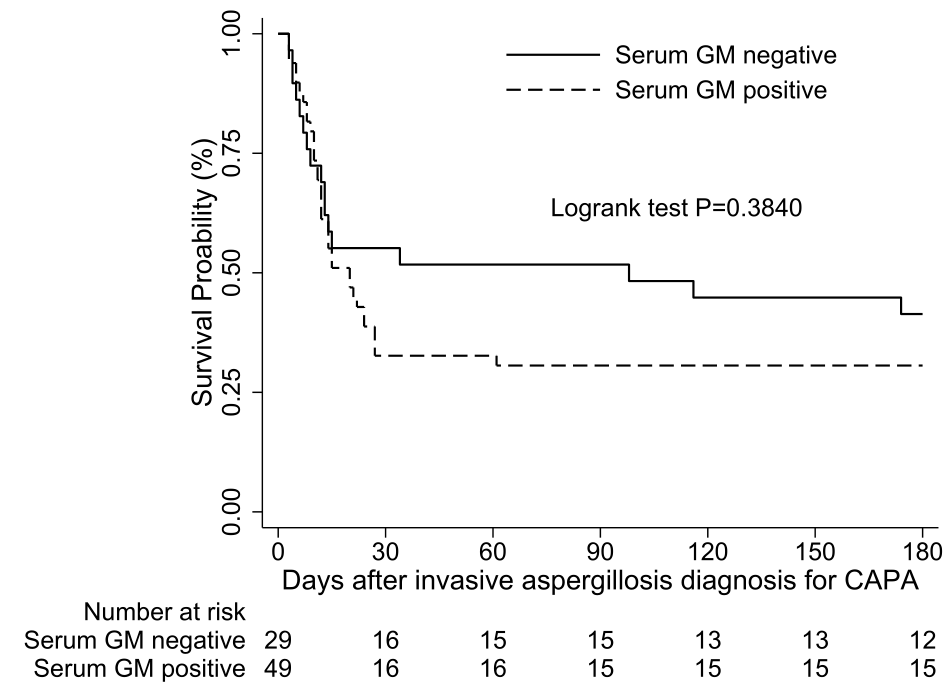
**

**Figure S1. Kaplan–Meier plots of the patients with CAPA according to serum GM index.**

Abbreviations: CAPA: coronavirus disease–associated invasive pulmonary aspergillosis; GM, galactomannan.

**Figure S2.**


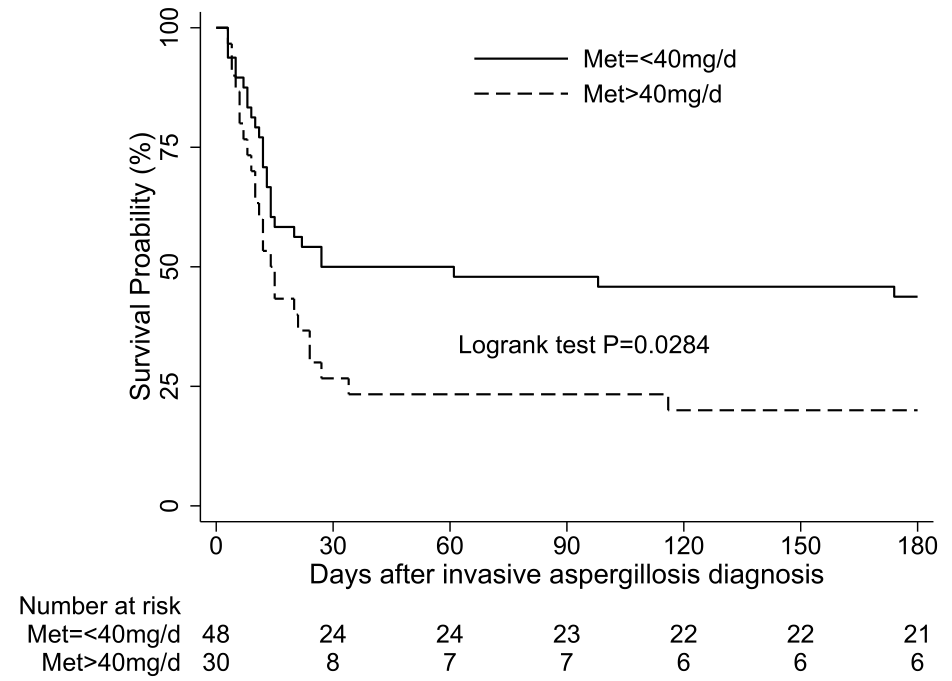


**Figure S2. Survival curve of the patients with CAPA according to Methylprednisolone dosage.**

Abbreviations: CAPA: coronavirus disease–associated invasive pulmonary aspergillosis; Met, Methylprednisolone.

**Table S1. Bacterial Co-infection or Secondary Bacterial Infection of COVID-19 Patients with or without CAPA at the time of CAPA diagnosis***

| **Tracheal aspirate or sputum culture** | **Total**  **N= 28 (%)** | **With CAPA**  **N=12(%)** | **Without CAPA**  **N=16 (%)** | **p value** |
| --- | --- | --- | --- | --- |
| Klebsiella spp. | 13 (46.4) | 10 (62.5) | 3 (25.0) | 0.055 |
| Acinetobacter baumannii | 10 (35.7) | 6 (50.0) | 4 (25.0) | 0.167 |
| Stenotrophomonas maltophilia | 2 (7.1) | 2 (16.7) | 0 (0.0) | 0.175 |
| Pseudomonas spp. | 2 (7.1) | 1 (8.3) | 0 (6.3) | 0.683 |
| Escherichia coli | 1 (3.6) | 0 (0.0) | 1 (6.3) | 0.571 |

**Abbreviations:** CAPA, coronavirus-associated invasive pulmonary aspergillosis; COVID-19, coronavirus disease 2019;

* These bacteria were from the culture of tracheal aspirate or sputum.
